# Supplementary material for: Adaptive genetic variation at three loci in South African vervet monkeys (Chlorocebus pygerythrus) and the role of selection within primates
Source: PeerJ. 2018 Jun 4;6:e4953. doi: 10.7717/peerj.4953 (PMC5991302; doi:10.7717/peerj.4953)
Supplement: Supplemental Information 4 — Values of very small magnitude were rounded to four decimal places. [file peerj-06-4953-s004.xlsx]

## Sheet: Sheet1
Title: Adaptive genetic variation at three loci in South African vervet monkeys (Chlorocebus pygerythrus) and the role of selection within Primates
Authors: Willem G. Coetzer, Trudy R. Turner, Christopher A. Schmitt and J. Paul Grobler
Supplementary Table S3. The statistical results from the Generalized linear model (GLM) analyses performed on the vervet monkey ACR, TLR4, TLR7 sequences from the current study and D-loop DNA sequences from Turner et al (2016b). Values of very small magnitude were rounded to four decimal places.
		Average annual precipitation (MAP):	Average annual ambient temparature (MAT):	Maximum annual temperature (MaxT):
Acrosin	Slope a:	-0.0003	-0.0428	-0.00056
	Intercept b:	0.3582	0.9999	0.21603
	Standard error a:	0.0002	0.0364	0.027099
	Standard error b:	0.1503	0.6868	0.96403
	Log liklihood:	-3	-3	-3
	G:	1.4298	1.3826	0.00043392
	p:	0.2318	0.2397	0.9834
TLR4	Slope a:	-0.00023002	-0.0036447	0.014239
	Intercept b:	0.26835	0.20118	-0.37239
	Standard error a:	0.00015509	0.19813	0.018283
	Standard error b:	0.10131	3.7366	0.65042
	Log liklihood:	-3	-0.062329	-3
	G:	2.1997	0.00033842	0.60657
	p:	0.138	0.9853	0.4361
TLR7	Slope a:	0.00058291	0.052544	-0.030589
	Intercept b:	-0.094375	-0.73726	1.3344
	Standard error a:	0.00025966	0.051247	0.035117
	Standard error b:	0.16962	0.96649	1.2493
	Log liklihood:	-3	-3	-3
	G:	5.0394	1.0513	0.75877
	p:	0.02478	0.3052	0.3837
D-loop	Slope a:	-0.0005299	0.077574	0.093194
	Intercept b:	0.71588	-1.053	-2.9026
	Standard error a:	0.00048124	0.19813	0.040864
	Standard error b:	0.31437	3.7366	1.4537
	Log liklihood:	-3	-0.45268	-3
	G:	1.2124	0.1533	5.2012
	p:	0.2708	0.6954	0.02257
